# Supplementary material for: Bedside Hyperspectral Imaging and Organ Dysfunction Severity in Critically Ill COVID-19 Patients—A Prospective, Monocentric Observational Study
Source: MDPI journal article supplement (doi:10.3390/bioengineering10101167), 2023-10-06
Supplement: s1 [file s1]

*Supplementary Materials*

# Bedside Hyperspectral Imaging and Organ Dysfunction Severity in Critically Ill COVID-19 Patients—A Prospective, Monocentric Observational Study

Henning Kuhlmann <sup>1</sup>, Lena Garczarek <sup>1</sup>, David Künne <sup>1</sup>, Kevin Pattberg <sup>1</sup>, Annabell Skarabis <sup>1</sup>, Mirjam Frank <sup>2</sup>, Borge Schmidt <sup>2</sup>, Sven Arends <sup>1</sup>, Frank Herbstreit <sup>1</sup>, Thorsten Brenner <sup>1</sup>, Karsten Schmidt <sup>1,†</sup> and Florian Espeter <sup>1,\*,†</sup>

<sup>1</sup> Department of Anesthesiology and Intensive Care Medicine, University Hospital Essen, University Duisburg-Essen, 45147 Essen, Germany

<sup>2</sup> Institute for Medical Informatics, Biometry and Epidemiology, University Hospital Essen, University Duisburg-Essen, 45147 Essen, Germany

\* Correspondence: [florian.espeter@uk-essen.de](mailto:florian.espeter@uk-essen.de); Tel.: +49-201-723-84485

† These authors contributed equally to this work.

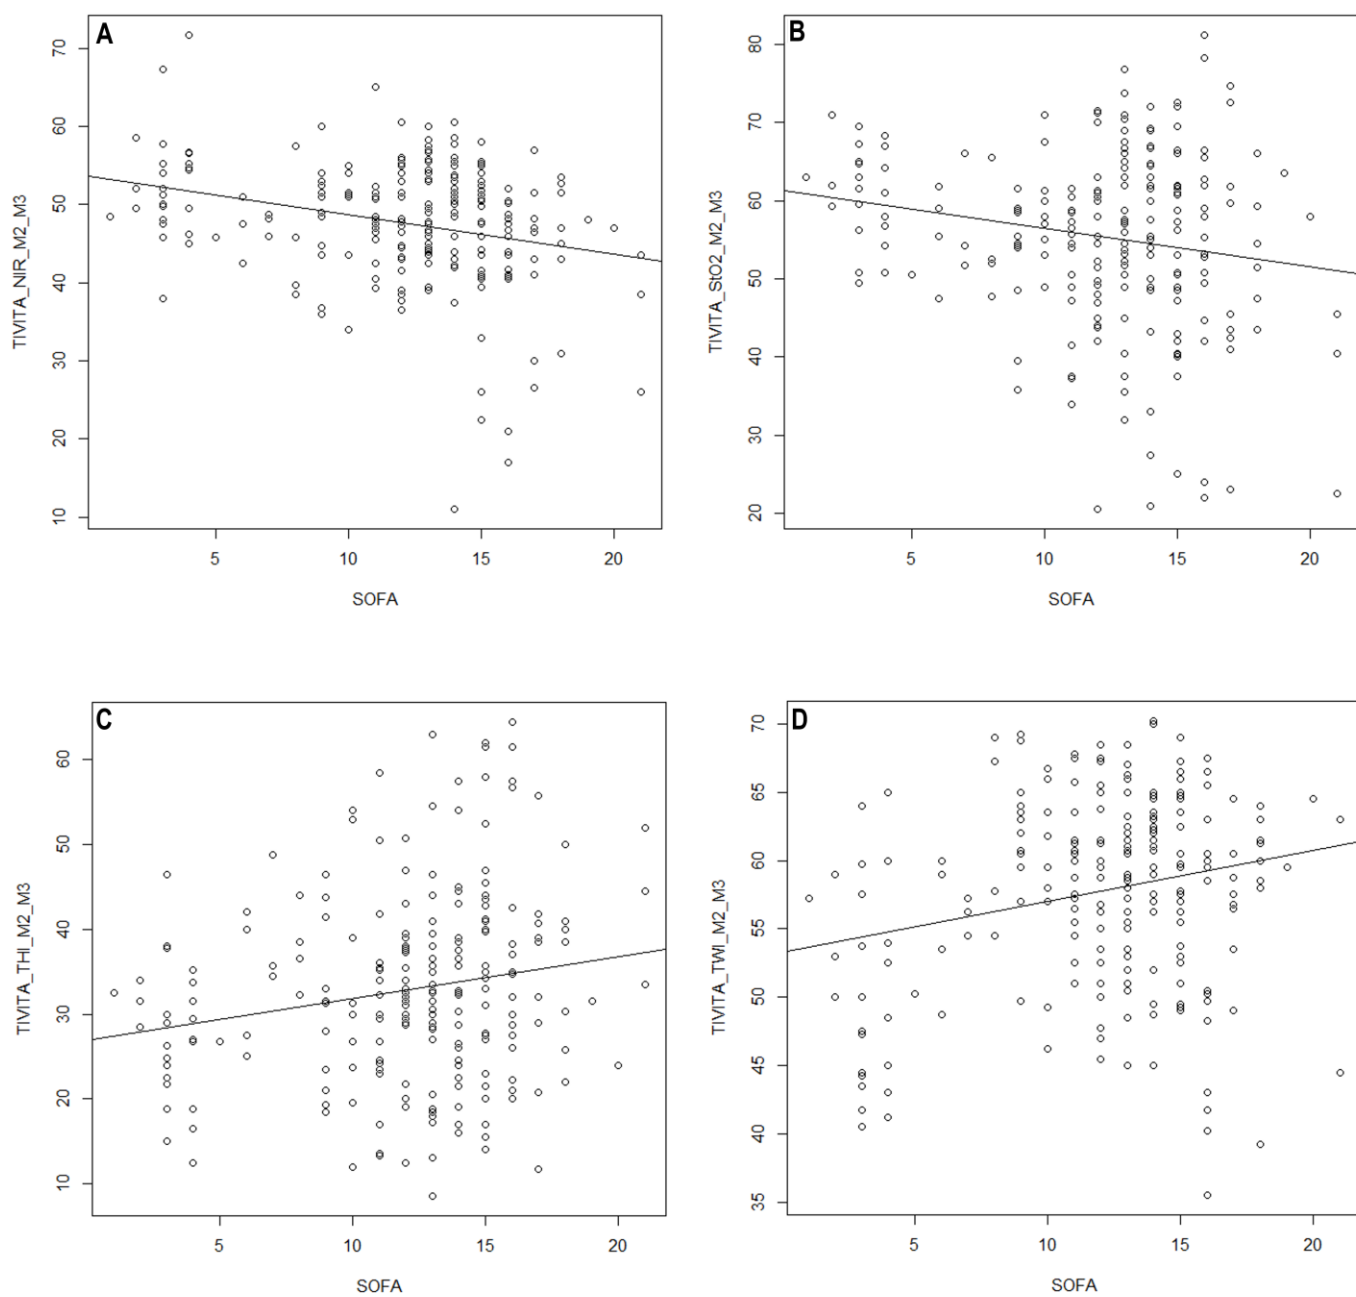

**Figure S1.** Scatter plots illustrating the association of NPI (A), StO2 (B), THI (C), and TWI (D) with SOFA score including all examination time points (day 0, day 1, day 2, day 3, and day 7).

**Table S1.** Characteristics of critically ill COVID-19 patients (Espeter et al., 2022) [14]. \* Median (inter-quartile range). CCI—Charlson Comorbidity Index; BMI—Body mass index; vvEVMO—veno-venous extracorporeal membrane oxygenation; SOFA—the sequential organ failure assessment score.

| <b>Characteristics of critically ill COVID-19 patients.</b> |            |
|-------------------------------------------------------------|------------|
| number of patients ( <i>n</i> )                             | 52         |
| age (years) *                                               | 59 (51–66) |
| Male *                                                      | 36 (69%)   |
| clinical data                                               |            |
| CCI *                                                       | 2 (2–3)    |
| BMI (kg/m <sup>2</sup> ) *                                  | 31 (28–36) |
| at ICU admission                                            |            |
| spontaneous breathing,                                      |            |
| oxygen dependent                                            | 6 (11.5%)  |
| ventilated                                                  | 46 (88.5%) |
| non-invasive                                                | 6 (11.5%)  |
| invasive                                                    | 40 (77%)   |
| vvECMO during ICU stay                                      | 40 (77%)   |
| initiation at referring ICU                                 | 25 (48%)   |
| initiation after ICU admission                              | 15 (28%)   |
| outcome                                                     |            |
| 28-day survivors                                            | 19 (36%)   |
